# Supplementary material for: Elimination of BRAF p.V600E under selective pressure of BRAF-targeted therapy and expansion of a PIK3CA p.E542K clone in a patient with recurrent malignant glomus tumor
Source: Research Square preprint supplement (doi:10.21203/rs.3.rs-7041059/v1), 2025-08-05
Supplement: Supplementary file 1 [file bd6fbb9dc1f8e59c549c9dfe.pdf]

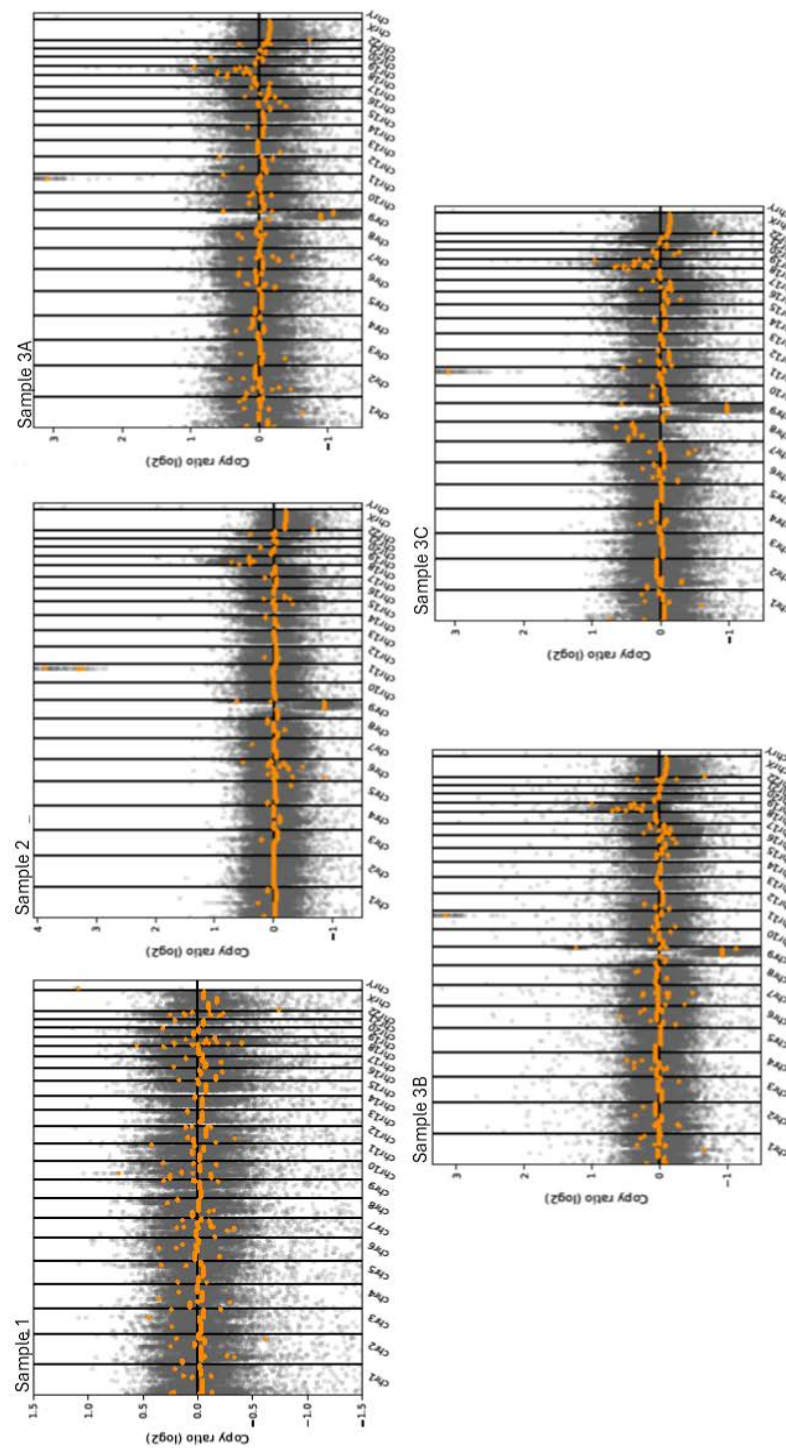

**Supplementary Figure 2:** Digital karyotype from initial diagnosis (sample 1), core needle biopsy specimen from second recurrence (sample 2) and specimens from second surgical resection (samples 3A, 3B, 3C). Notably, no evidence of BRAF gene locus (chr7) loss is noted in any of the five samples. Additionally, specimens 2, 3A, 3B and 3C share a number of structural alterations, including the chr9q loss, chr19q gain and chr11q focal amplification, supporting the clonal relatedness of all four recent samples.
